# Supplementary material
Source: PubMed Central journal article supplement (PMC4794398)
Supplement: NIHMS760660-supplement-4.pdf [file NIHMS760660-supplement-4.pdf]

# Figure S1

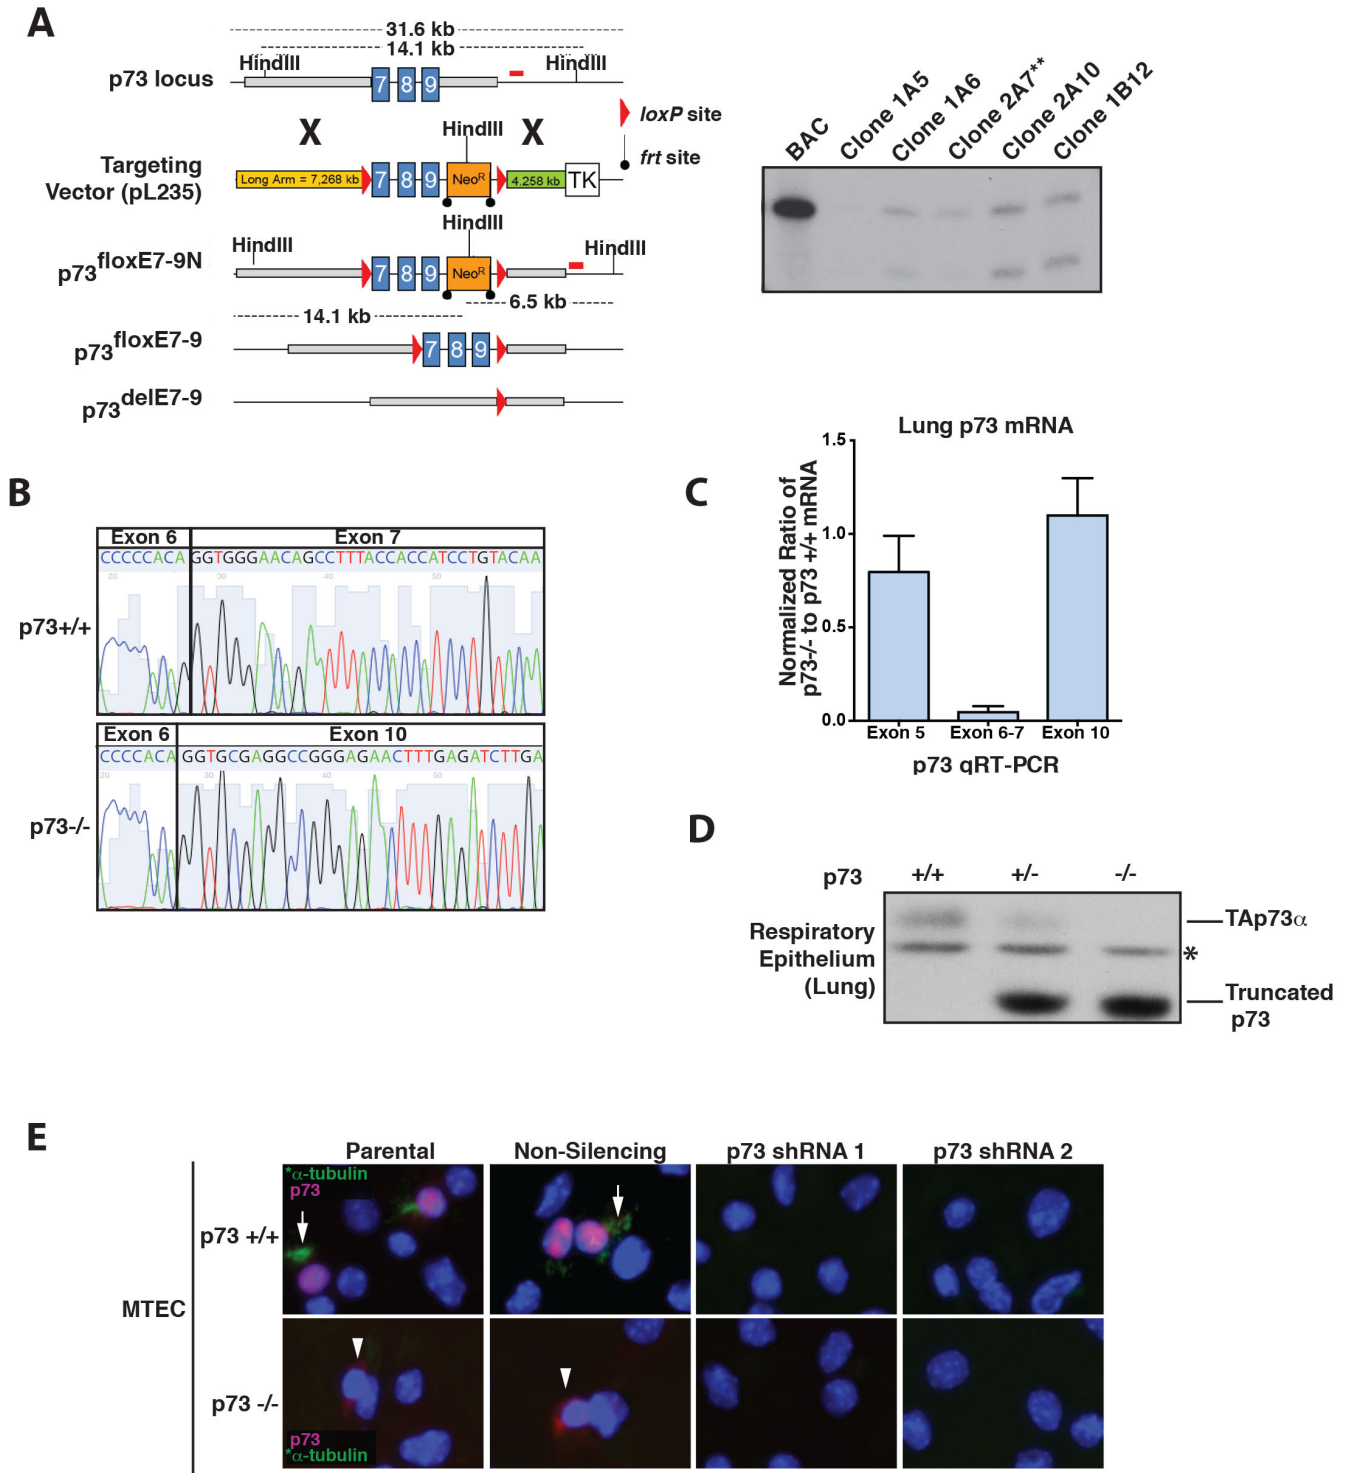

**Figure S2**

**A**

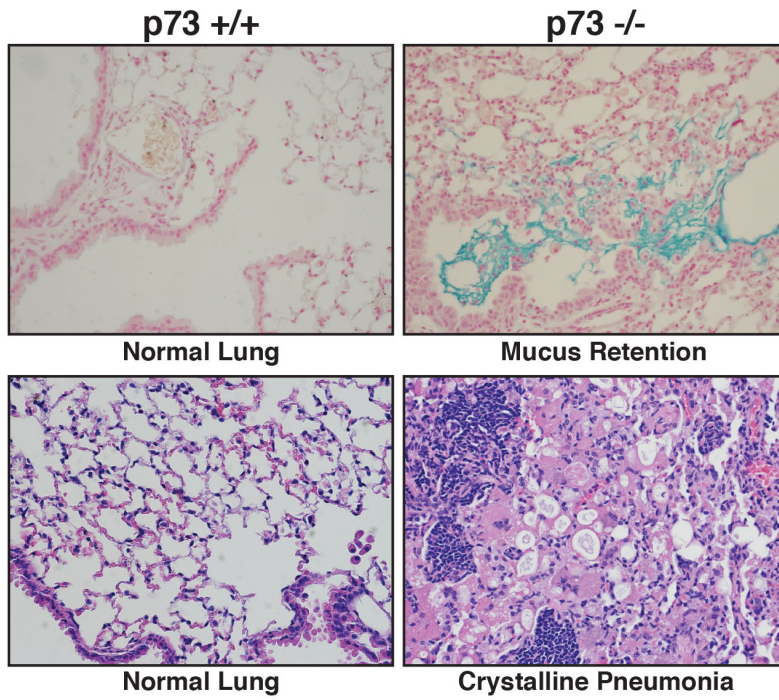

**B**

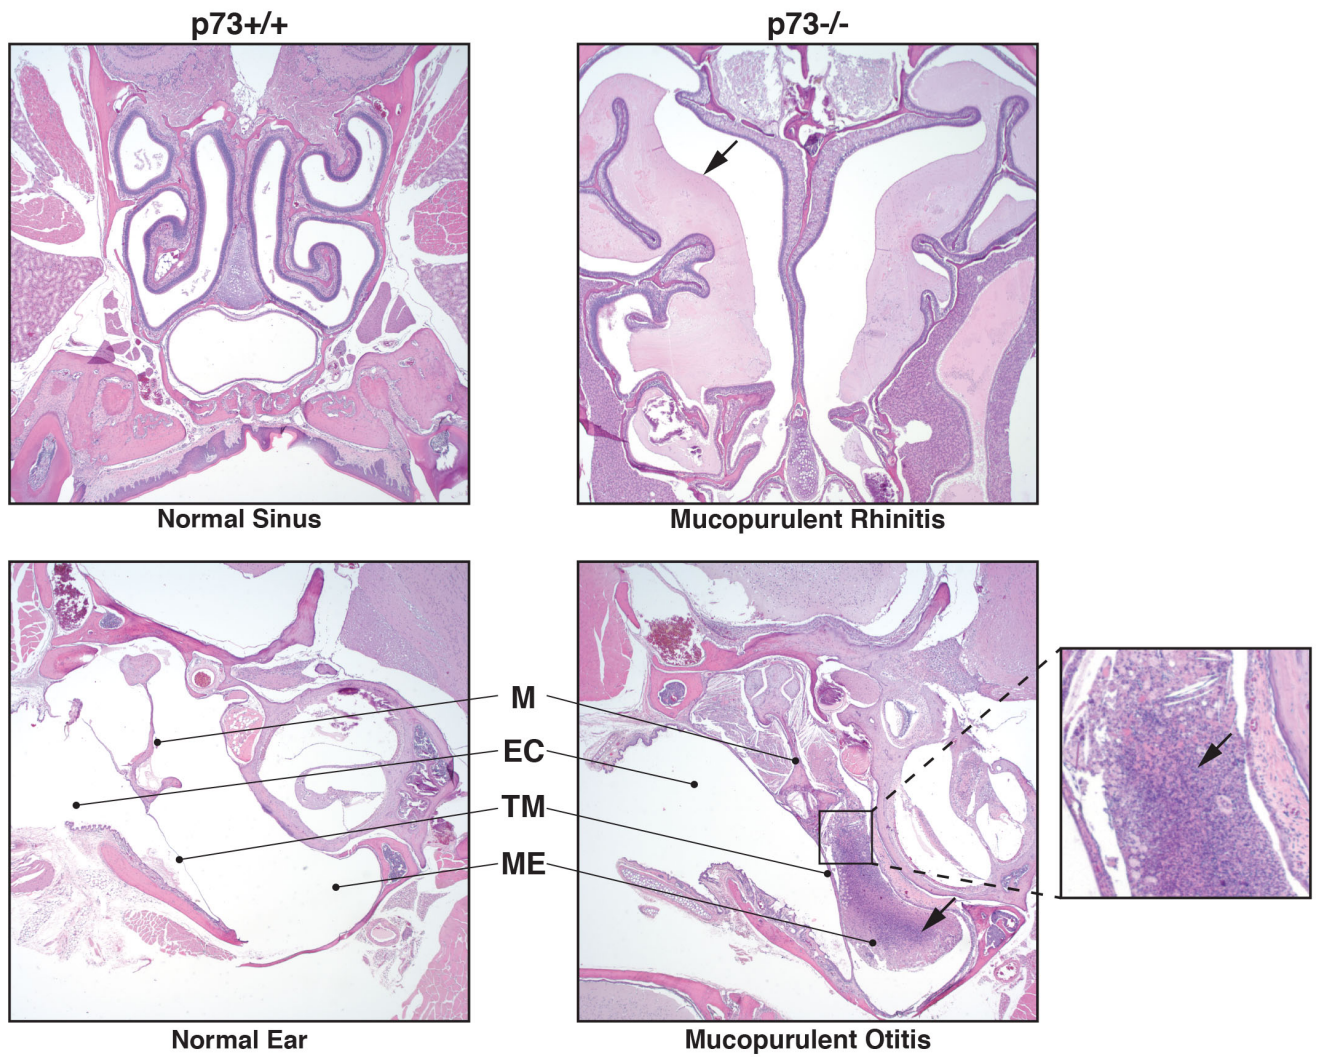



**Figure S3**

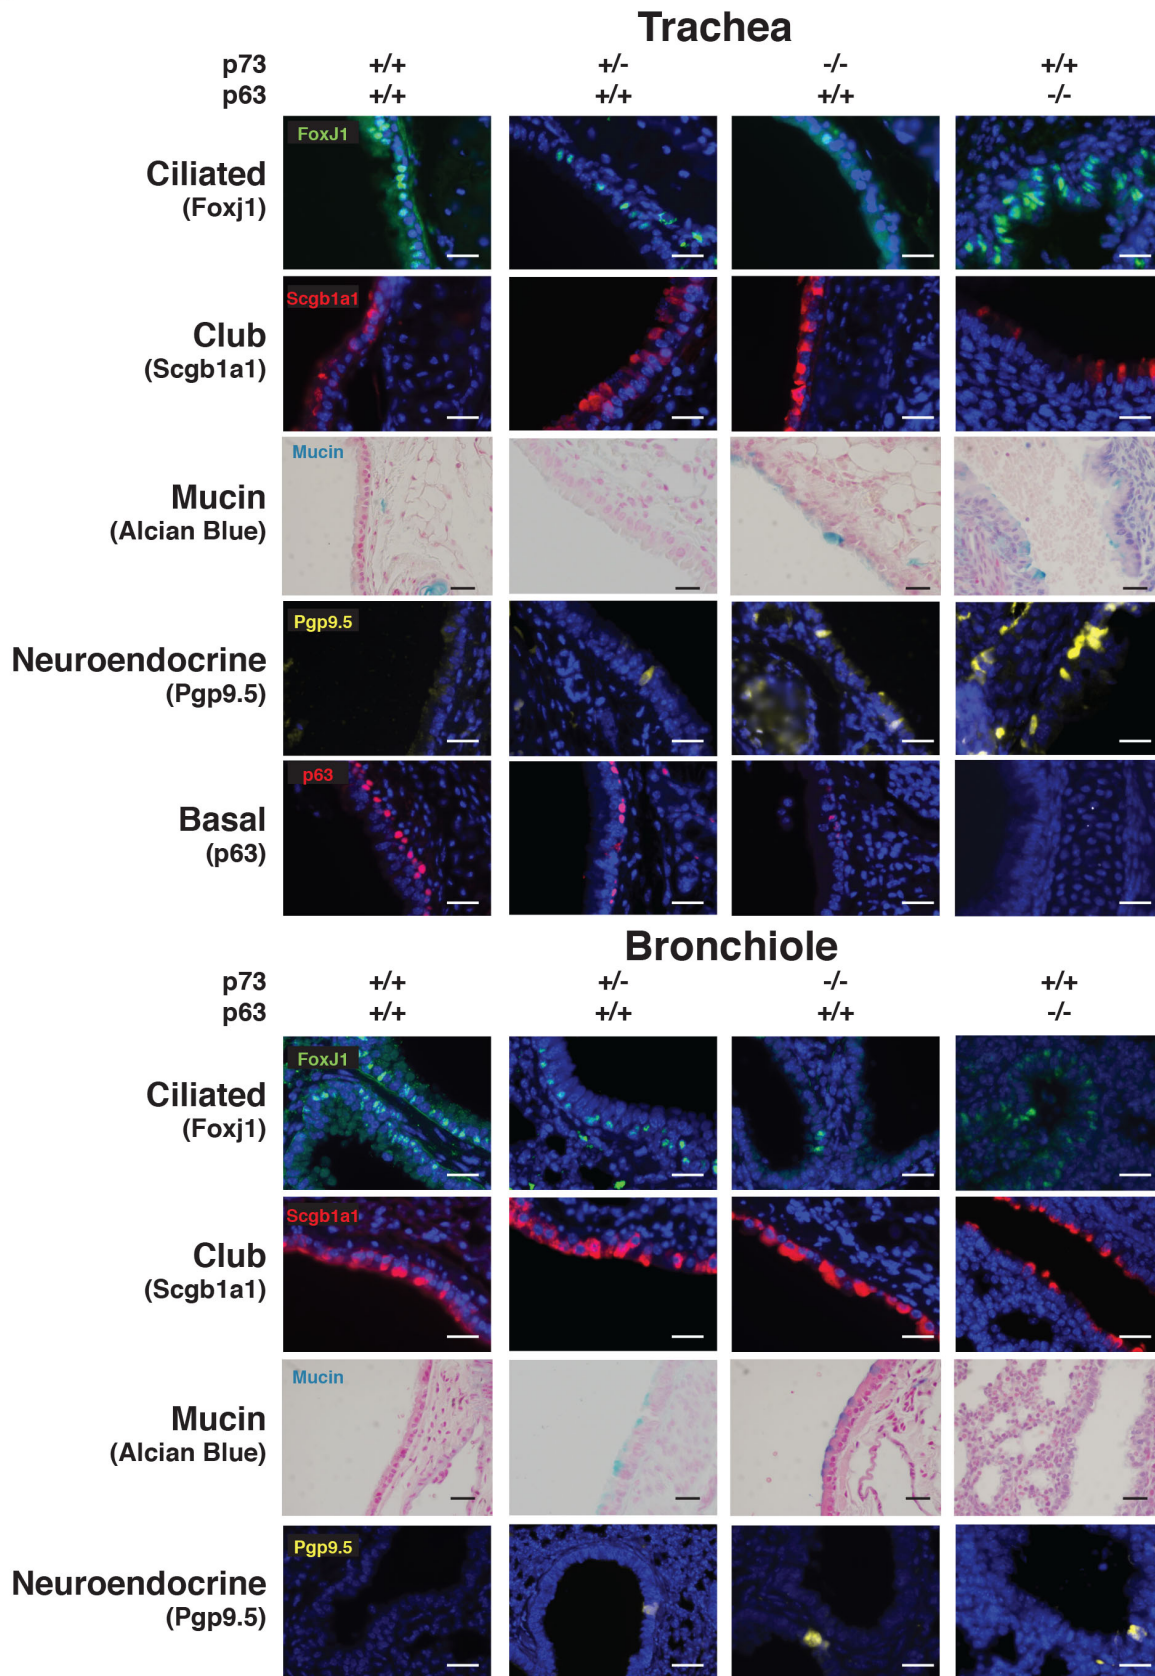

Figure S4

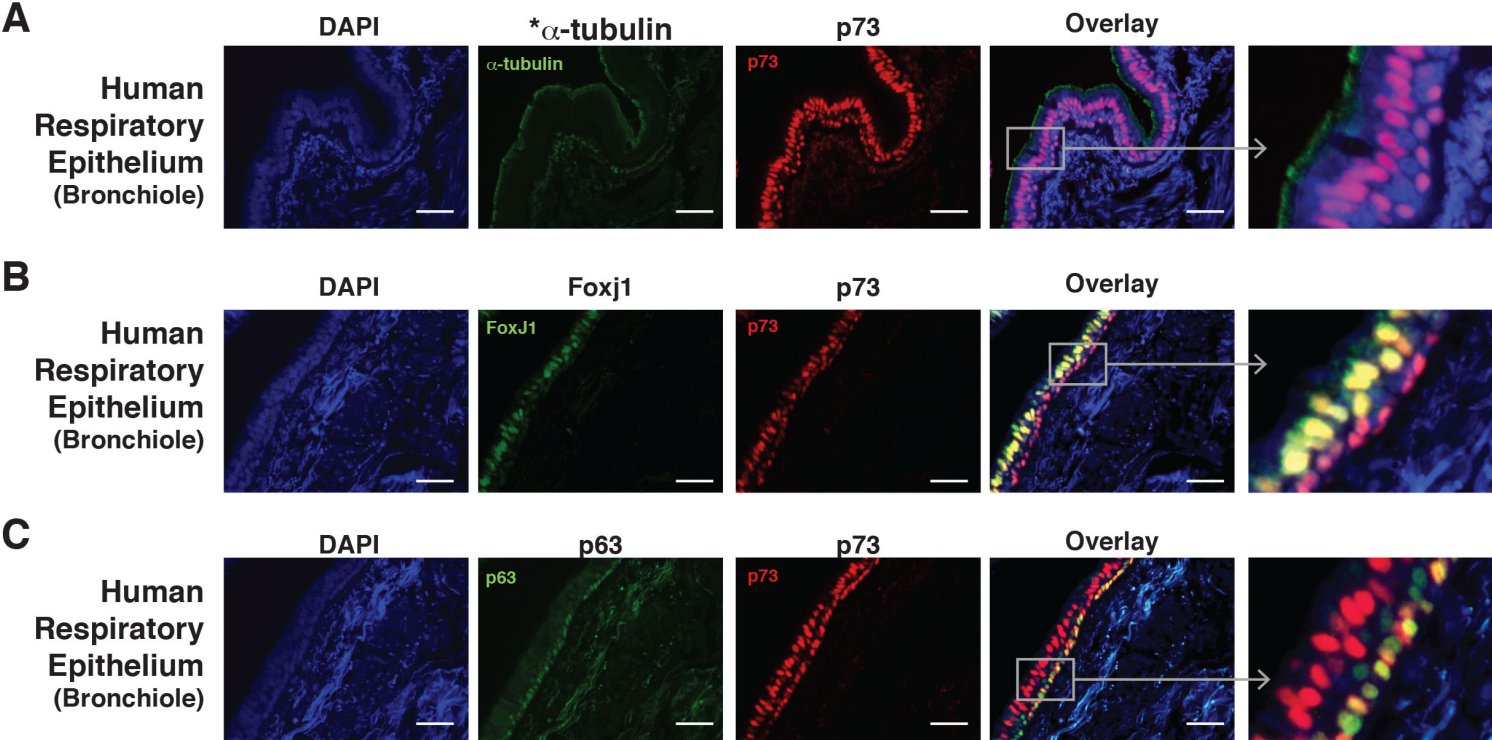

# Figure S5

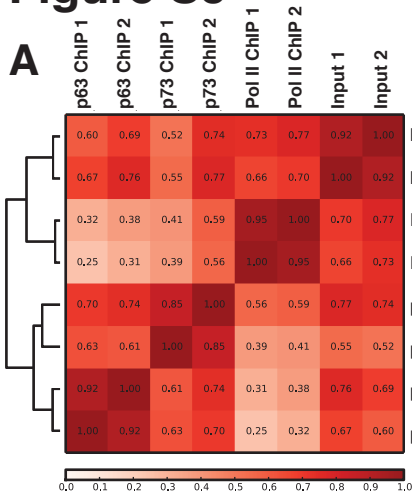

**B**

| Sample      | Number of Binding Sites | Median Distance to Nearest TSS (bp) |
|-------------|-------------------------|-------------------------------------|
| Pol II ChIP | 53,684                  | 1,484                               |
| p73 ChIP    | 1,767                   | 9,531                               |
| p63 ChIP    | 3,861                   | 12,810                              |

**C**

|            | Analysis of the Genomic Binding Sites |                      |           |            |                      |          |            |                      |          |
|------------|---------------------------------------|----------------------|-----------|------------|----------------------|----------|------------|----------------------|----------|
|            | p73                                   |                      |           | p63        |                      |          | Pol II     |                      |          |
|            | # of Peaks                            | Log Ratio Enrichment | P-value   | # of Peaks | Log Ratio Enrichment | P-value  | # of Peaks | Log Ratio Enrichment | P-value  |
| Promoters  | 259                                   | 2.11                 | 1.02E-114 | 127        | 0.75                 | 4.06E-13 | 16943      | 3.14                 | 0.00E+00 |
| CpG Island | 175                                   | 2.52                 | 3.48E-83  | 59         | 1.19                 | 6.30E-16 | 14635      | 3.93                 | 0.00E+00 |
| UTR 5'     | 151                                   | 2.58                 | 3.86E-38  | 33         | 0.7                  | 1.10E-02 | 11795      | 3.95                 | 0.00E+00 |
| Exons      | 217                                   | 0.53                 | 8.31E-07  | 204        | 0.22                 | 3.26E-03 | 18323      | 1.95                 | 0.00E+00 |
| TTS        | 37                                    | 0.19                 | 2.15E-01  | 63         | -0.01                | 4.91E-01 | 4889       | 1.85                 | 0.00E+00 |
| Coding     | 85                                    | -0.05                | 3.89E-01  | 123        | 0.14                 | 1.29E-01 | 10425      | 1.5                  | 0.00E+00 |
| UTR 3'     | 18                                    | -0.12                | 3.45E-01  | 62         | 0.23                 | 5.37E-02 | 2735       | 1.19                 | 0.00E+00 |
| Introns    | 791                                   | -0.07                | 2.41E-03  | 1928       | 0.04                 | 7.05E-03 | 25776      | -0.26                | 0.00E+00 |
| Intergenic | 730                                   | -0.66                | 0.00E+00  | 1740       | -0.62                | 0.00E+00 | 13864      | -1.37                | 0.00E+00 |

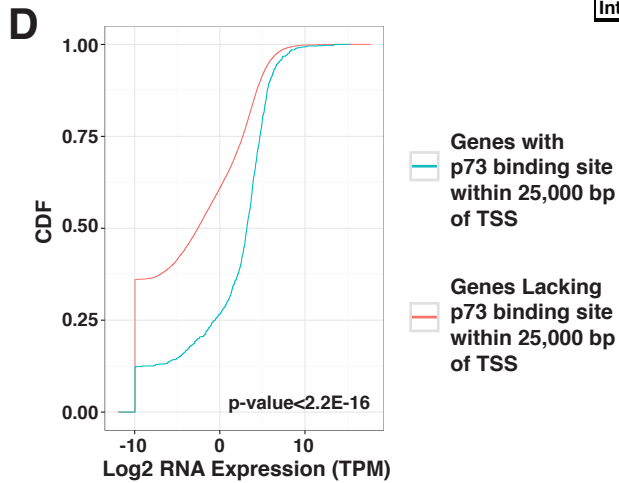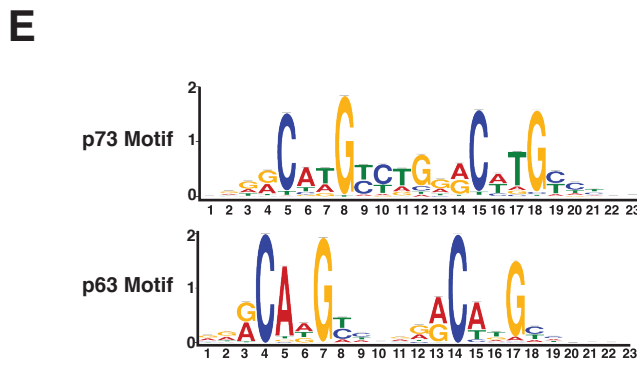

**F**

| Representative Genes Previously Reported as p73 Target Genes |            |                        |                         |
|--------------------------------------------------------------|------------|------------------------|-------------------------|
| Gene Symbol                                                  | q-value    | Distance (bp) from TSS | Overlapping p63 Binding |
| Mdm2                                                         | 7.9433E-46 | -7,029                 |                         |
|                                                              | 1.2589E-16 | -15                    | ✓                       |
| Cdkn1a                                                       | 1.5849E-27 | -11,938                | ✓                       |
|                                                              | 1E-12      | 740                    |                         |
|                                                              | 1E-09      | -9                     |                         |

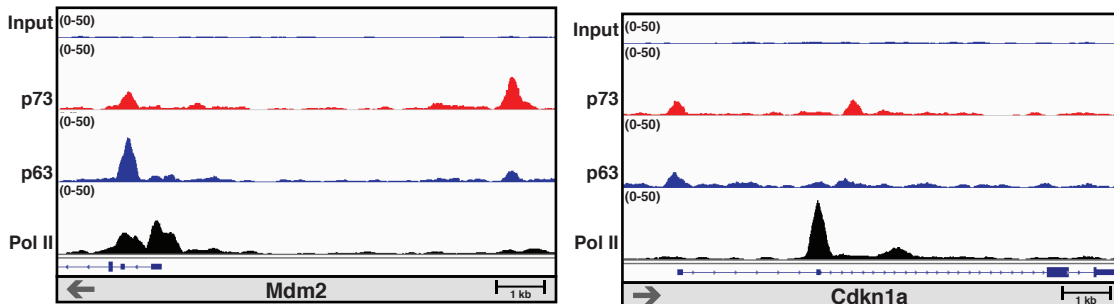

Figure S6

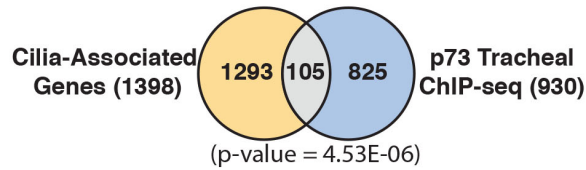

| Overlap of Cilia-Associated Gene Set and p73 ChIP-seq |             |                        |                         |
|-------------------------------------------------------|-------------|------------------------|-------------------------|
| Gene Symbol                                           | q-value     | Distance (bp) from TSS | Overlapping p63 Binding |
| Traf3ip1                                              | 7.9433E-123 | -4,151                 | ✓                       |
| 4833427G06Rik                                         | 5.0119E-114 | -3,895                 | ✓                       |
| Hs6st2                                                | 1.9953E-110 | 8,582                  | ✓                       |
| Rbl2                                                  | 1.2589E-107 | 12,036                 | ✓                       |
| Foxj1                                                 | 1.5849E-103 | 8,146                  | ✓                       |
| Cct4                                                  | 6.30957E-96 | -1,122                 | ✓                       |
| Ercc3                                                 | 1E-92       | 20,031                 |                         |
| Spata18                                               | 3.16228E-84 | -1,498                 |                         |
| Lztf11                                                | 1.99526E-75 | 5,409                  |                         |
| Glipr1                                                | 3.98107E-75 | -209                   |                         |
| Usp2                                                  | 2.51189E-72 | -180                   | ✓                       |
| Slc38a6                                               | 1.25893E-70 | 8,104                  | ✓                       |
| 6430531B16Rik                                         | 5.01187E-69 | 8,233                  | ✓                       |
| Rgs3                                                  | 6.30957E-69 | 2,338                  | ✓                       |
| Slc25a17                                              | 3.16228E-68 | 3,624                  | ✓                       |
| Myb                                                   | 5.01187E-67 | 4,187                  | ✓                       |
| Trp73                                                 | 1.58489E-64 | -8,719                 | ✓                       |
| Gm684                                                 | 5.01187E-57 | 9,498                  | ✓                       |
| Zfp51                                                 | 3.98107E-50 | -11,405                |                         |
| Ccdc113                                               | 1.58489E-47 | 13,738                 |                         |
| Trit1                                                 | 2.51189E-46 | -2,229                 | ✓                       |
| Gnpat1                                                | 1.25893E-45 | -17,281                |                         |
| Stk33                                                 | 3.98107E-45 | 3,531                  |                         |
| Glis3                                                 | 5.01187E-42 | 22,548                 | ✓                       |
| Fam161a                                               | 6.30957E-40 | -16                    | ✓                       |
| Tp73                                                  | 1.25893E-39 | -161                   |                         |
| Exo1                                                  | 7.94328E-38 | -4,782                 |                         |
| Cyp2s1                                                | 7.94328E-38 | -2,1047                | ✓                       |
| Tubb4b                                                | 3.98107E-37 | -767                   | ✓                       |
| Foxj1                                                 | 5.01187E-37 | 5,006                  | ✓                       |
| Dcdc2a                                                | 1.58489E-36 | -24,669                |                         |
| Aox1                                                  | 6.30957E-35 | 22,462                 |                         |
| Ppil6                                                 | 1.25893E-32 | 814                    | ✓                       |
| Wdr38                                                 | 1.58489E-32 | -9,073                 | ✓                       |
| Sirt3                                                 | 3.16228E-32 | 558                    |                         |
| Cyp2s1                                                | 2.51189E-31 | -15,181                | ✓                       |
| Pex3                                                  | 5.01187E-31 | -39                    |                         |
| Banp                                                  | 6.30957E-28 | 303                    |                         |
| Fxn                                                   | 3.16228E-26 | 10,028                 | ✓                       |
| Mtg1                                                  | 3.16228E-26 | -17                    |                         |
| Cmb1                                                  | 1.25893E-25 | 1,029                  | ✓                       |
| Ankrd10                                               | 3.16228E-22 | -8,753                 |                         |
| Arc                                                   | 6.30957E-21 | 6,716                  |                         |
| Tmem57                                                | 2.51189E-20 | -2,702                 |                         |
| Zfp667                                                | 5.01187E-20 | -1,941                 |                         |
| Spag16                                                | 1E-19       | 2,678                  |                         |
| Stx16                                                 | 6.30957E-19 | -46                    | ✓                       |
| Tiam1                                                 | 3.98107E-18 | -15,934                | ✓                       |
| Hipk1                                                 | 5.01187E-18 | -19,180                |                         |
| 2310007B03Rik                                         | 5.01187E-18 | 7                      | ✓                       |
| Atp6v1h                                               | 1E-17       | 20,715                 | ✓                       |
| Krr1                                                  | 1.99526E-17 | 29                     |                         |
| Sec24b                                                | 1E-16       | 6,221                  | ✓                       |
| Megf6                                                 | 3.98107E-16 | 10,490                 | ✓                       |
| Rbm34                                                 | 1E-15       | -27                    |                         |
| Mphosph10                                             | 1.99526E-15 | -20                    |                         |

| Overlap of Cilia-Associated Gene Set and p73 ChIP-seq |             |                        |                         |
|-------------------------------------------------------|-------------|------------------------|-------------------------|
| Gene Symbol                                           | q-value     | Distance (bp) from TSS | Overlapping p63 Binding |
| Rrp15                                                 | 1.99526E-15 | -26                    |                         |
| Tmem101                                               | 1.99526E-15 | -22                    |                         |
| Pih1d2                                                | 3.98107E-15 | -7                     |                         |
| Hdac8                                                 | 1.25893E-14 | 23,315                 | ✓                       |
| Lgals12                                               | 1.58489E-14 | 23,839                 | ✓                       |
| Eps8                                                  | 1.99526E-13 | -537                   | ✓                       |
| Med12l                                                | 1.99526E-13 | -15,360                |                         |
| Pla2g16                                               | 3.16228E-13 | -4,289                 |                         |
| Edc4                                                  | 5.01187E-13 | -23                    |                         |
| Cep135                                                | 1.58489E-12 | 411                    |                         |
| Ugt1a6a                                               | 1.58489E-12 | -192                   | ✓                       |
| Mrlp39                                                | 5.01187E-12 | -61                    |                         |
| Dnaic1                                                | 6.30957E-12 | -3,120                 |                         |
| Rel                                                   | 1.25893E-11 | 189                    |                         |
| Pepd                                                  | 1.99526E-11 | 4,566                  |                         |
| Tmem69                                                | 3.16228E-11 | -45                    |                         |
| Man2c1                                                | 5.01187E-11 | 55                     |                         |
| Sord                                                  | 1.25893E-10 | -3,167                 | ✓                       |
| Psmf1                                                 | 1.58489E-10 | -53                    |                         |
| Alkbh3                                                | 1.99526E-10 | -42                    |                         |
| Gapvd1                                                | 6.30957E-10 | 987                    |                         |
| Riid1                                                 | 7.94328E-10 | 3,844                  | ✓                       |
| Ap3m2                                                 | 0.000000001 | -5,110                 | ✓                       |
| Ccdc17                                                | 0.000000001 | -45                    | ✓                       |
| Foxj1                                                 | 1.25893E-09 | 5,828                  | ✓                       |
| Dnaic2                                                | 1.99526E-09 | -24,855                | ✓                       |
| Rfx3                                                  | 2.51189E-09 | -13,813                |                         |
| Jag1                                                  | 6.30957E-09 | 8,416                  | ✓                       |
| 1110004E09Rik                                         | 7.94328E-09 | -26                    |                         |
| B230118H07Rik                                         | 1.25893E-08 | -961                   |                         |
| Anxa8                                                 | 3.16228E-08 | -148                   |                         |
| 2610028H24Rik                                         | 3.98107E-08 | -1,709                 |                         |
| Golga3                                                | 5.01187E-08 | -54                    |                         |
| Nhs1                                                  | 7.94328E-08 | -19,948                |                         |
| 1700001C02Rik                                         | 7.94328E-08 | 1596                   |                         |
| Ect2                                                  | 1.58489E-07 | 11,005                 | ✓                       |
| Cryaa                                                 | 2.51189E-07 | 8,583                  | ✓                       |
| Faf2                                                  | 2.51189E-07 | 7,552                  | ✓                       |
| 2700049A03Rik                                         | 2.51189E-07 | 208                    |                         |
| Bms1                                                  | 5.01187E-07 | 3                      |                         |
| Entpd5                                                | 7.94328E-07 | 482                    | ✓                       |
| Slc25a17                                              | 0.000001    | 3,919                  | ✓                       |
| Dgcr6                                                 | 1.25893E-06 | 4,841                  |                         |
| Dpcd                                                  | 1.58489E-06 | 5,594                  |                         |
| Lrpprc                                                | 1.58489E-06 | 2,588                  |                         |
| Slc47a2                                               | 1.58489E-06 | 22,724                 |                         |
| Slc35b1                                               | 1.99526E-06 | 3,663                  | ✓                       |
| Dpagt1                                                | 1.99526E-06 | -31                    |                         |
| Mettl15                                               | 7.94328E-06 | -32                    |                         |
| Mlit10                                                | 0.00001     | -7,089                 | ✓                       |
| Nek2                                                  | 3.16228E-05 | -1,283                 |                         |
| Glipr1                                                | 6.30957E-05 | 549                    |                         |
| Ces1b                                                 | 6.30957E-05 | -222                   | ✓                       |
| B230118H07Rik                                         | 6.30957E-05 | -82                    |                         |
| Tnpo3                                                 | 6.30957E-05 | 77                     |                         |
| Rcbtb2                                                | 0.000199526 | -12,004                | ✓                       |

\*Gray highlighting indicates genes that were differentially expressed after ectopic overexpression of p73 in either p73+/+ and/or p73-/- MTEC cultures



**Table S1. Quantification of Epithelial Cells within Pulmonary Epithelium**

| Genotype           | Trachea                                                                                                             |        |          |        |       | Bronchiole                                                                                                          |        |          |        |
|--------------------|---------------------------------------------------------------------------------------------------------------------|--------|----------|--------|-------|---------------------------------------------------------------------------------------------------------------------|--------|----------|--------|
|                    | Number of the indicated type cells / Total number of all cells lining the respiratory epithelium in a field of view |        |          |        |       | Number of the indicated type cells / Total number of all cells lining the respiratory epithelium in a field of view |        |          |        |
|                    | Neuroendocrine                                                                                                      | Mucin  | Ciliated | Club   | Basal | Neuroendocrine                                                                                                      | Mucin  | Ciliated | Club   |
| p73+/-             | 4/98                                                                                                                | 0/101  | 16/46    | 15/61  | 18/60 | 0/48                                                                                                                | 0/52   | 36/92    | 19/38  |
|                    | 0/67                                                                                                                | 0/94   | 23/57    | 20/76  | 10/46 | 6/130                                                                                                               | 1/31   | 36/129   | 22/40  |
|                    | 13/110                                                                                                              | 0/82   | 7/19     | 16/39  | 21/90 | 3/106                                                                                                               | 2/49   | 30/90    | 22/31  |
|                    | 0/98                                                                                                                | 0/84   | 14/32    | 12/50  | 12/48 | 7/67                                                                                                                | 0/44   | 26/81    | 36/57  |
|                    | 0/104                                                                                                               | 2/112  | 22/47    | 18/72  | 14/50 | 0/66                                                                                                                | 2/32   | 22/94    | 32/48  |
|                    | 0/71                                                                                                                | 0/91   | 13/37    | 26/97  | 13/54 | 0/55                                                                                                                | 0/62   | 25/72    | 39/70  |
|                    | 2/81                                                                                                                | 0/77   | 13/39    | 17/71  | 9/41  | 3/76                                                                                                                | 0/58   | 26/91    | 35/51  |
|                    | 1/46                                                                                                                | 3/210  | 20/54    | 13/62  | 12/42 | 0/48                                                                                                                | 0/80   | 27/86    | 19/32  |
|                    | 0/58                                                                                                                | 5/167  | 22/41    | 16/42  | 12/46 | 4/80                                                                                                                | 3/63   | 18/46    | 42/60  |
|                    | 0/67                                                                                                                | 3/121  | 18/58    | 18/44  | 13/39 | 0/113                                                                                                               | 2/60   | 10/56    | 45/60  |
|                    | 0/93                                                                                                                | 1/76   | 18/45    | 15/34  | 13/36 | 0/89                                                                                                                | 1/73   | 9/30     | 20/31  |
|                    | 0/66                                                                                                                | 3/141  | 15/44    | 12/39  | 10/36 | 0/118                                                                                                               | 4/64   | 9/26     | 26/43  |
|                    | 2/89                                                                                                                | 2/76   | 24/63    | 20/70  | 21/65 | 0/75                                                                                                                | 0/72   | 19/60    | 20/32  |
|                    | 1/46                                                                                                                | 2/78   | 20/48    | 12/39  | 11/31 | 7/84                                                                                                                | 0/43   | 15/44    | 28/42  |
|                    | 0/67                                                                                                                | 0/132  | 27/74    | 14/52  | 12/45 | 0/124                                                                                                               | 0/31   | 10/34    | 28/40  |
|                    | 0/102                                                                                                               | 0/104  | 25/68    | 20/60  | 16/35 | 1/90                                                                                                                | 3/88   | 10/38    | 79/90  |
|                    | 0/57                                                                                                                | 0/66   | 22/60    | 12/49  | 19/64 | 2/55                                                                                                                | 0/59   | 33/89    | 49/63  |
|                    | 0/86                                                                                                                | 0/79   | 24/66    | 15/50  | 23/72 | 0/46                                                                                                                | 1/47   | 12/31    | 35/53  |
|                    | 2/91                                                                                                                | 6/134  | 15/53    | 56/118 | 20/71 | 0/53                                                                                                                | 0/51   | 8/41     | 38/57  |
|                    | 1/49                                                                                                                | 18/213 | 19/51    | 14/47  | 25/86 | 3/85                                                                                                                | 5/87   | 10/71    | 38/51  |
| 0/51               | 0/95                                                                                                                | 19/61  | 9/27     | 12/38  | 0/62  | 2/31                                                                                                                | 12/40  | 39/75    |        |
| 1/65               | 0/134                                                                                                               | 18/54  | 11/37    | 14/51  | 0/69  | 0/64                                                                                                                | 15/64  | 43/63    |        |
| 2/53               | 0/92                                                                                                                | 11/49  | 27/94    | 18/61  | 0/72  | 1/57                                                                                                                | 12/52  | 41/52    |        |
| 1/52               | 0/145                                                                                                               | 42/140 | 23/62    | 12/39  | 0/91  | 2/78                                                                                                                | 15/54  | 23/35    |        |
| Average % Positive | 1.5                                                                                                                 | 1.5    | 36.5     | 31.1   | 29.3  | 1.8                                                                                                                 | 2.1    | 29.5     | 66.5   |
| Standard Deviation | 2.6                                                                                                                 | 2.2    | 6.3      | 7.0    | 5.2   | 2.9                                                                                                                 | 2.4    | 6.6      | 8.8    |
| p73-/-             | 1/53                                                                                                                | 4/125  | 10/54    | 24/47  | 19/76 | 2/47                                                                                                                | 0/135  | 15/50    | 40/51  |
|                    | 4/102                                                                                                               | 5/134  | 10/67    | 11/27  | 14/60 | 0/75                                                                                                                | 0/120  | 17/90    | 29/37  |
|                    | 0/97                                                                                                                | 3/98   | 14/50    | 16/54  | 15/59 | 4/143                                                                                                               | 0/114  | 18/92    | 29/35  |
|                    | 0/71                                                                                                                | 3/142  | 14/41    | 22/64  | 18/66 | 2/126                                                                                                               | 9/142  | 12/57    | 20/33  |
|                    | 4/78                                                                                                                | 2/189  | 12/65    | 12/29  | 18/62 | 0/110                                                                                                               | 5/117  | 23/97    | 19/24  |
|                    | 0/70                                                                                                                | 2/74   | 9/48     | 34/72  | 10/44 | 1/54                                                                                                                | 0/124  | 13/61    | 28/36  |
|                    | 8/125                                                                                                               | 0/110  | 6/29     | 12/33  | 11/40 | 2/54                                                                                                                | 0/132  | 17/77    | 35/48  |
|                    | 5/73                                                                                                                | 7/114  | 12/66    | 10/34  | 13/58 | 1/42                                                                                                                | 0/129  | 15/72    | 55/87  |
|                    | 1/60                                                                                                                | 2/98   | 8/41     | 14/54  | 12/39 | 6/126                                                                                                               | 2/150  | 13/78    | 75/103 |
|                    | 1/53                                                                                                                | 5/130  | 21/40    | 14/37  | 16/52 | 1/21                                                                                                                | 0/142  | 15/54    | 79/109 |
|                    | 4/78                                                                                                                | 4/99   | 15/48    | 13/27  | 12/53 | 0/84                                                                                                                | 0/119  | 15/42    | 39/58  |
|                    | 3/59                                                                                                                | 8/145  | 12/61    | 9/25   | 11/45 | 2/42                                                                                                                | 4/121  | 15/62    | 28/40  |
|                    | 3/70                                                                                                                | 3/63   | 9/52     | 15/27  | 26/64 | 0/115                                                                                                               | 0/129  | 9/39     | 25/34  |
|                    | 1/80                                                                                                                | 7/102  | 13/54    | 14/40  | 16/50 | 3/38                                                                                                                | 7/135  | 17/66    | 40/50  |
|                    | 1/62                                                                                                                | 13/172 | 15/95    | 17/49  | 10/46 | 1/44                                                                                                                | 4/88   | 11/62    | 20/29  |
|                    | 0/97                                                                                                                | 8/92   | 16/77    | 24/54  | 11/43 | 1/46                                                                                                                | 3/98   | 15/78    | 28/38  |
|                    | 0/74                                                                                                                | 6/135  | 8/54     | 25/53  | 14/41 | 2/74                                                                                                                | 4/104  | 9/44     | 46/64  |
|                    | 4/64                                                                                                                | 5/150  | 31/143   | 16/31  | 10/36 | 1/62                                                                                                                | 8/151  | 11/70    | 39/55  |
|                    | 0/78                                                                                                                | 13/155 | 14/65    | 26/52  | 12/49 | 1/190                                                                                                               | 0/132  | 21/79    | 34/44  |
|                    | 1/60                                                                                                                | 5/82   | 15/78    | 20/34  | 16/53 | 3/126                                                                                                               | 0/75   | 12/88    | 35/47  |
| 4/84               | 7/117                                                                                                               | 15/72  | 35/55    | 15/72  | 1/48  | 0/94                                                                                                                | 18/84  | 35/48    |        |
| 0/96               | 1/87                                                                                                                | 32/121 | 46/64    | 20/78  | 2/60  | 0/124                                                                                                               | 19/87  | 40/55    |        |
| 1/65               | 4/94                                                                                                                | 16/76  | 32/47    | 10/54  | 2/252 | 0/68                                                                                                                | 18/73  | 38/56    |        |
| 1/68               | 5/75                                                                                                                | 12/61  | 25/43    | 10/42  | 4/68  | 1/110                                                                                                               | 24/79  | 36/45    |        |
| Average % Positive | 2.5                                                                                                                 | 4.4    | 20.6     | 45.7   | 26.7  | 2.6                                                                                                                 | 1.6    | 22.6     | 73.2   |
| Standard Deviation | 2.4                                                                                                                 | 2.3    | 5.3      | 12.5   | 5.1   | 2.0                                                                                                                 | 2.2    | 5.0      | 5.5    |
| p73-/-             | 2/40                                                                                                                | 17/180 | 4/88     | 16/28  | 8/38  | 4/54                                                                                                                | 4/55   | 1/55     | 30/36  |
|                    | 3/106                                                                                                               | 13/140 | 3/66     | 22/32  | 7/36  | 3/56                                                                                                                | 11/38  | 0/54     | 21/26  |
|                    | 3/56                                                                                                                | 8/98   | 2/64     | 13/28  | 9/45  | 6/108                                                                                                               | 10/50  | 2/25     | 25/32  |
|                    | 1/63                                                                                                                | 6/146  | 2/40     | 20/37  | 11/53 | 1/29                                                                                                                | 9/104  | 1/54     | 47/59  |
|                    | 2/38                                                                                                                | 18/165 | 2/54     | 20/38  | 19/90 | 3/79                                                                                                                | 5/44   | 0/54     | 35/43  |
|                    | 4/50                                                                                                                | 13/110 | 2/50     | 19/31  | 16/73 | 0/63                                                                                                                | 13/32  | 0/27     | 23/28  |
|                    | 6/68                                                                                                                | 3/66   | 2/48     | 22/30  | 11/59 | 2/79                                                                                                                | 3/38   | 2/41     | 33/42  |
|                    | 1/75                                                                                                                | 7/106  | 2/40     | 28/43  | 12/55 | 0/55                                                                                                                | 2/45   | 3/52     | 45/53  |
|                    | 1/42                                                                                                                | 18/155 | 3/55     | 38/59  | 14/69 | 4/71                                                                                                                | 7/40   | 2/50     | 21/25  |
|                    | 2/57                                                                                                                | 14/170 | 2/39     | 28/44  | 15/72 | 1/61                                                                                                                | 4/30   | 2/51     | 41/56  |
|                    | 2/77                                                                                                                | 8/70   | 0/36     | 36/56  | 8/41  | 3/96                                                                                                                | 4/48   | 2/30     | 32/45  |
|                    | 4/60                                                                                                                | 9/120  | 0/62     | 30/46  | 10/45 | 1/69                                                                                                                | 4/34   | 4/65     | 43/51  |
|                    | 3/54                                                                                                                | 20/190 | 0/56     | 16/28  | 15/70 | 4/107                                                                                                               | 6/41   | 2/40     | 49/62  |
|                    | 0/62                                                                                                                | 6/71   | 0/74     | 18/24  | 10/82 | 4/65                                                                                                                | 2/50   | 2/79     | 36/40  |
|                    | 2/84                                                                                                                | 8/79   | 4/55     | 27/31  | 9/45  | 1/96                                                                                                                | 5/45   | 2/40     | 27/34  |
|                    | 2/67                                                                                                                | 5/54   | 0/54     | 37/51  | 13/73 | 0/63                                                                                                                | 5/51   | 0/22     | 33/40  |
|                    | 3/80                                                                                                                | 3/49   | 2/24     | 18/25  | 9/41  | 5/68                                                                                                                | 8/63   | 0/45     | 40/48  |
|                    | 0/68                                                                                                                | 19/147 | 3/54     | 7/11   | 5/55  | 5/92                                                                                                                | 9/54   | 1/49     | 21/25  |
|                    | 3/65                                                                                                                | 7/63   | 1/27     | 25/33  | 8/51  | 0/54                                                                                                                | 9/71   | 2/47     | 28/35  |
|                    | 4/103                                                                                                               | 11/116 | 3/50     | 17/21  | 9/60  | 1/78                                                                                                                | 6/40   | 0/50     | 33/40  |
| 2/53               | 3/118                                                                                                               | 2/41   | 27/41    | 14/72  | 3/87  | 2/28                                                                                                                | 1/41   | 28/35    |        |
| 3/68               | 2/101                                                                                                               | 3/51   | 17/28    | 6/29   | 4/70  | 3/74                                                                                                                | 1/66   | 36/41    |        |
| 2/63               | 4/115                                                                                                               | 3/65   | 19/35    | 9/48   | 5/104 | 3/62                                                                                                                | 0/44   | 17/21    |        |
| 1/74               | 8/99                                                                                                                | 3/40   | 25/42    | 7/42   | 2/78  | 2/82                                                                                                                | 1/40   | 27/31    |        |
| Average % Positive | 3.7                                                                                                                 | 8.3    | 4.1      | 65.0   | 19.0  | 3.3                                                                                                                 | 12.3   | 2.8      | 81.6   |
| Standard Deviation | 2.2                                                                                                                 | 3.1    | 2.5      | 9.5    | 3.2   | 2.5                                                                                                                 | 8.5    | 2.5      | 4.2    |
| p63-/-             | 10/92                                                                                                               | 18/87  | 67/115   | 24/149 | 1/51  | 1/53                                                                                                                | 0/48   | 32/61    | 40/92  |
|                    | 5/48                                                                                                                | 28/196 | 79/123   | 37/171 | 0/49  | 7/75                                                                                                                | 0/75   | 45/78    | 48/117 |
|                    | 4/52                                                                                                                | 9/99   | 76/128   | 17/141 | 2/44  | 3/39                                                                                                                | 0/44   | 36/64    | 47/94  |
|                    | 10/65                                                                                                               | 10/71  | 73/127   | 13/140 | 0/56  | 4/102                                                                                                               | 0/42   | 29/61    | 47/112 |
|                    | 6/91                                                                                                                | 16/67  | 95/170   | 19/136 | 0/62  | 2/65                                                                                                                | 0/51   | 49/93    | 59/141 |
|                    | 5/50                                                                                                                | 8/48   | 73/121   | 23/145 | 0/68  | 3/71                                                                                                                | 0/39   | 39/94    | 45/92  |
|                    | 8/100                                                                                                               | 8/65   | 43/89    | 14/94  | 2/53  | 4/78                                                                                                                | 0/33   | 38/75    | 45/108 |
|                    | 7/95                                                                                                                | 13/134 | 55/98    | 13/53  | 3/58  | 1/75                                                                                                                | 0/67   | 39/69    | 44/97  |
|                    | 5/91                                                                                                                | 13/120 | 67/96    | 9/97   | 1/52  | 1/42                                                                                                                | 0/49   | 49/83    | 55/116 |
|                    | 3/40                                                                                                                | 25/80  | 44/79    | 8/63   | 0/72  | 2/57                                                                                                                | 0/47   | 68/101   | 30/72  |
|                    | 6/54                                                                                                                | 24/139 | 117/191  | 8/74   | 1/29  | 2/77                                                                                                                | 0/52   | 40/68    | 45/105 |
|                    | 6/75                                                                                                                | 12/80  | 90/153   | 11/121 | 0/60  | 4/60                                                                                                                | 0/84   | 43/96    | 52/123 |
|                    | 12/130                                                                                                              | 11/74  | 35/63    | 18/107 | 2/48  | 3/45                                                                                                                | 0/56   | 79/152   | 35/73  |
|                    | 12/96                                                                                                               | 16/109 | 61/97    | 22/145 | 1/62  | 5/66                                                                                                                | 0/62   | 36/83    | 35/91  |
|                    | 16/114                                                                                                              | 13/91  | 48/94    | 4/48   | 1/63  | 2/84                                                                                                                | 0/133  | 32/76    | 57/123 |
|                    | 5/51                                                                                                                | 6/73   | 34/64    | 4/44   | 0/48  | 3/67                                                                                                                | 0/59   | 28/69    | 83/140 |
|                    | 7/70                                                                                                                | 17/130 | 56/94    | 6/59   | 1/60  | 4/80                                                                                                                | 0/117  | 29/60    | 45/90  |
|                    | 5/65                                                                                                                | 6/89   | 35/87    | 11/63  | 0/64  | 0/76                                                                                                                | 0/84   | 39/74    | 50/103 |
|                    | 4/63                                                                                                                | 18/103 | 32/49    | 8/88   | 0/42  | 3/65                                                                                                                | 0/76   | 39/50    | 28/62  |
|                    | 4/50                                                                                                                | 9/79   | 57/83    | 6/44   | 1/48  | 4/78                                                                                                                | 0/47   | 55/127   | 25/55  |
| 7/65               | 8/57                                                                                                                | 72/99  | 5/54     | 2/54   | 2/53  | 0/80                                                                                                                | 68/134 | 50/102   |        |
| 6/68               | 13/149                                                                                                              | 78/104 | 7/56     | 0/61   | 5/68  | 0/53                                                                                                                | 33/80  | 28/64    |        |
| 2/50               | 14/66                                                                                                               | 78/112 | 37/209   | 1/77   | 5/63  | 0/76                                                                                                                | 43/93  | 62/148   |        |
| 6/51               | 25/180                                                                                                              | 50/88  | 20/147   | 0/66   | 1/75  | 0/65                                                                                                                | 45/104 | 35/88    |        |
| Average % Positive | 9.2                                                                                                                 | 14.8   | 60.8     | 13.5   | 1.5   | 4.5                                                                                                                 | 0.0    | 50.3     | 45.2   |
| Standard Deviation | 2.7                                                                                                                 | 5.4    | 6.8      | 4.2    | 1.7   | 2.4                                                                                                                 | 0.0    | 7.1      | 4.5    |

**Table S4. Cilia-Associated Gene Set**

| MGI Gene Symbol |               |               |               |         |          |               |               |               |               |               |
|-----------------|---------------|---------------|---------------|---------|----------|---------------|---------------|---------------|---------------|---------------|
| Ncs1            | Nek2          | Slc1a4        | 1700019L03Rik | Dnaic1  | Mthfd2l  | Trip13        | Pddc1         | B4galt5       | Atp13a2       | Kif24         |
| Ccdc67          | Elmod1        | Cntrb         | 1700026D08Rik | Dnaic2  | Mtr      | Trnp1         | Cyp2s1        | Ephx4         | Ehf           | Api5          |
| 1700007G11Rik   | Zfyve19       | Rbmx2         | 1700028P14Rik | Dnd1    | Mtssl1   | Troap         | Dgcr6         | Ccnj          | Blzf1         | Psmd10        |
| Foxj1           | Ccdc30        | Nphp1         | 1700066M21Rik | Dpy19l2 | Muc5b    | Trp73         | 3110082l17Rik | Lpar6         | Ect2          | Pfdn2         |
| 1110017D15Rik   | Fignl1        | Slc38a1       | 1700084C01Rik | Dpysl5  | Myo5a    | Ttc12         | Adi1          | Ankib1        | Kctd4         | Rfx3          |
| Stk33           | Sptlc3        | Nln           | 4930427A07Rik | Dydc2   | Nags     | Ttc16         | Gm3500        | Pmf1          | Rbm19         | Ercc3         |
| Spag17          | Mns1          | Tmem107       | 4930503B20Rik | Eccscr  | Naip1    | Ttc22         | Fgfr10p       | Pak3          | Zfp692        | Gale          |
| Ccdc39          | Vwa3a         | Ublcp1        | 4931429l11Rik | Efhh    | Neto2    | Ttc29         | Fam193b       | Ddx39         | Ipo7          | Btf3l4        |
| Lrriq1          | Lrguk         | Plch1         | 4932438H23Rik | Efna2   | Neurl1a  | Ttc30a2       | Nsg1          | Upk2          | Zfyve9        | Ccnc          |
| Efhc1           | Naa40         | Sdccag8       | 4933427G17Rik | Eml1    | Nr5a2    | Ttk           | Rhou          | Tmem184c      | Tex9          | Taf9b         |
| Lrrc23          | Top2a         | Spag6         | 9230112D13Rik | Ephb2   | Nrip3    | Tube2         | Htr2b         | H1fx          | Tmem69        | Mkl2          |
| Mlf1            | 6430531B16Rik | Phc1          | AA467197      | Erp27   | Ntsr2    | Ubash3a       | Tfdp1         | Bbs2          | Cenpj         | Ttf1          |
| 6820408C15Rik   | Frrs1         | Fam118a       | Aard          | Exo1    | Nudt12   | Ubxn10        | Cntd1         | Plk4          | St14          | Dpdc          |
| Traf3ip1        | Zfp354b       | Lig1          | Acsml         | Fam109b | Oip5     | Ugt8a         | Alkbh2        | Il12rb2       | Aldh3a2       | Ift52         |
| Kif9            | 2610028H24Rik | Scrib         | Actl7b        | Fam132b | Oit1     | Vhmk1         | Vill          | Ercc6l        | Ccdc122       | Zfp791        |
| Lrrc36          | Asrgl1        | Tsr1          | Agr3          | Fam149a | Olf19    | Unc5c         | Fbxo30        | Cmas          | Krr1          | Lnx1          |
| Fank1           | Riid1         | Prodh         | Agtr1a        | Fam179a | Olf798   | Vash2         | Khdrbs3       | Zfyve1        | Fkbp4         | Fhdc1         |
| Enkur           | Tm4sf1        | Haus4         | Ak8           | Fam19a5 | Ospb13   | Vit           | Gpx2          | B230118H07Rik | Sorbs1        | B3galt2       |
| Tekt4           | Fam188b       | Gm20604       | Amn           | Fbxo21  | Palb2    | Wdr38         | Ccdc138       | Cbx7          | Bmp2          | Lyp1a2        |
| Ccdc40          | 1700012B09Rik | Myb           | Ankrd42       | Fgl1    | Pappa2   | Wdr73         | Pnck          | Utp15         | Acdb7         | Ppil6         |
| Hs6t2           | Fam81a        | Fbxo36        | Aox1          | Flywch1 | Pbk      | Xk            | Kif3b         | Zfp821        | Kif3a         | Ora3          |
| Ccdc113         | Wdr63         | Rangrf        | Apobr         | Fmn2    | Pgbd5    | Xlr4b         | Fam118b       | Supv31l       | Rpf2          | Sharpin       |
| Wdpcp           | Efcab1        | Poi1          | Armcx6        | Fxyd1   | Pklr     | Zcchc4        | Gmcl1         | Mnt           | Arhgap24      | E2f5          |
| 1700016K19Rik   | Adam15        | Cro2a         | Asb17         | Galnt6  | Poteg    | Zfp474        | Ccdc51        | Tfap4         | Eif6          | Gnppat1       |
| Nek10           | Dnajc28       | Rab3ip        | Aspm          | Gemin6  | Prdm8    | Zfp770        | Tulp3         | Ripk2         | 2310007B03Rik | Tm7sf3        |
| Cdk1            | Ak7           | Pno1          | Atp10b        | Ghr1    | Prkar1b  | Zscan12       | Dpagt1        | Smarcad1      | Rnf170        | Akt2          |
| Mdm1            | Wdr34         | 4833427G06Rik | Atp13a5       | Gja6    | Prkg2    | Rad23a        | Ccdc78        | Wrap53        | Ptgr2         | Ctnnbl1       |
| BC051019        | Mak           | Zfp54         | BC048403      | Glb1l2  | Prr19    | Rps6ka5       | Alg11         | Taf11         | Znhit1        | Ercc6         |
| Nme5            | Cdc25c        | Ttc25         | BC049715      | Glipr1  | Prss48   | Gm5796        | Zbed4         | Alms1         | Mta1          | Phf6          |
| Rsp1            | Smarcd2       | Lmln          | Bcl2l10       | Glis3   | Pyroxd2  | Tsen15        | Zfp330        | Erb2          | Npm3          | Bmp8a         |
| Sorbs2          | BC055324      | Ankrd32       | Bcl2l14       | Glra3   | Rac2     | Rsp3b         | Agpat9        | Rab36         | Mblac1        | Arl3          |
| Melk            | Foxn4         | Fsp1          | Bok           | Glrp1   | Rad51ap1 | Morn5         | Ap4b1         | Cep192        | Ppp1r36       | Cul7          |
| Calb2           | Rnf32         | Odf3b         | Bub1b         | Gilt1d1 | Rad54b   | Pde9a         | Eepd1         | Dzip1l        | G6pc3         | Dtwd2         |
| Mcm8            | Ulka          | Chek2         | Bysl          | Gm10267 | Rd3      | AW554918      | Kpna1         | Klh21         | Itga7         | Fyco1         |
| Ckap2l          | Rsp19         | Kcnp4         | C1ra          | Gm11487 | Rel      | Ndc80         | Prdm15        | Cep571l       | Ccdc132       | Commd9        |
| Fam161a         | Tnn           | Dcdc2a        | C8g           | Gm1661  | Rgs4     | Hspa1l        | Wdr76         | Osgepl1       | Hcd17b14      | Cks2          |
| Ccno            | Gins2         | Bin3          | Calcoco2      | Gm3139  | Rhobtb2  | Rbp4          | Cpeb2         | Edc4          | Spef1         | Ebp           |
| Efcab10         | 1700003M02Rik | Cep164        | Capn6         | Gm3286  | Rhpn1    | Haus5         | Bola1         | Gm3696        | Cdc27         | Bphl          |
| Dnajb13         | Itih2         | Oraov1        | Caps2         | Gm3448  | Ribc1    | Akr7a5        | Zfhx2         | Zfp51         | Cbx2          | Uchi5         |
| Lrwd1           | Chmp6         | Spa17         | Car10         | Gm428   | Rinl     | Asap2         | H2-Q10        | Gprc5c        | AI314180      | Inpp5f        |
| 2010107G23Rik   | Ccdc60        | Pacrg         | Casc1         | Gstcd   | Scgn     | Tmem138       | Gm7           | Slu7          | Tdp1          | Brd8          |
| Kndc1           | Ankrd54       | Gm166         | Casc5         | Gtf2a1l | Scml2    | Gm2897        | Trnt1         | 1600002K03Rik | Tep1          | Aurka         |
| Spata24         | 1700026L06Rik | 3830408C21Rik | Ccdc103       | H1ftnt  | Scn3b    | Flnb          | Tmem231       | Lin9          | Crim1         | Sox2          |
| Nek5            | Agbl2         | Nudc          | Ccdc153       | H2-T22  | Scn3n    | Chn1          | 9130023H24Rik | Dhx30         | Prr14         | Cyb561d2      |
| 1700029J07Rik   | Ttll13        | Wdr90         | Ccdc158       | Hcn2    | Sfrp1    | Gpr85         | Sae1          | Rnf123        | Pcm1          | Fmod          |
| Dnal1           | Cdc20         | Atr           | Ccdc24        | Hdac8   | Sh3bp1   | Tnfrsf1b      | lqsec2        | Ttc8          | Bbs1          | Fastkd2       |
| Fhad1           | Akap14        | Flrt1         | Ccdc42b       | Hirip3  | Sidt1    | Rgs3          | Ogg1          | Actr6         | Cspp1         | Poc5          |
| Lrrc51          | Znrf2         | Anxa8         | Ccdc65        | Hpgd    | Slc10a2  | Rsl24d1       | Tmem144       | Calml4        | Ddit3         | Lpar4         |
| Pde3b           | Omd           | Dixdc1        | Ccdc47a       | Hrasls  | Slc10a5  | 1110004E09Rik | Cd83          | Rab12         | Dgke          | Odf1          |
| Fam183b         | Cmpk2         | Dynlrb2       | Ccdc89        | Hspb6   | Slc35e4  | Tmem194       | Dock8         | Cetn2         | Lrrfp12       | Atg16l1       |
| Fbxo16          | Cby1          | Heatr5a       | Ccl20         | Hspb9   | Slc38a3  | Ndufaf3       | Mrpl39        | Slc25a19      | Syt11         | Otud6b        |
| Zmynd10         | Dync2h1       | Lypd6b        | Ccnb1         | Hyls1   | Slc38a6  | Tyro3         | Gas2l3        | Nfkbl1        | Fkbp1         | Slc25a17      |
| Tekt1           | Lrrc48        | Isyna1        | Cd177         | Igln05  | Slc47a2  | Katnal1       | Zfp41         | Impad1        | Katn2         | Ppp6c         |
| Gm10639         | Tsnaxip1      | Sclt1         | Cd27          | Il27    | Spag16   | 2610301B20Rik | Psmg2         | Tex10         | Noxa1         | Kremen1       |
| Gsta2           | Capsl         | Cc2d2a        | Cdca5         | Inca1   | Spag5    | Daglb         | Oscp1         | Zfp341        | 1700123O20Rik | Ccnb2         |
| Olfml2b         | Cdkl4         | Cep152        | Cdk20         | lqcd    | Spag8    | Afap1         | Angptl7       | Arc           | Ascc1         | AK010878      |
| Agr2            | Smc2          | Gpn2          | Cenpa         | Itgae   | Spata18  | Ap3m2         | 1700007K13Rik | Stxbp4        | Tubb4b        | Arl6ip6       |
| Zfp667          | 9230110C19Rik | Sgk3          | Cenpe         | Itgam   | Spata20  | Slc12a4       | Copg2         | Pcsk6         | Glt8d1        | Hsd1l         |
| Lrrc46          | BC022687      | Ahsa1         | Cenph         | Itgb4   | Spc25    | H2afx         | Pygm          | Bmp8b         | Alg5          | Dtymk         |
| Cacnb3          | Gmfg          | Trp53inp1     | Cenpk         | Jsrp1   | Spsb4    | Cox6b2        | Six1          | Me2           | Eif5b         | Gabrp         |
| Fermt1          | L3mbtl2       | Abhd14a       | Cenpp         | Kcnk7   | Srgn     | Ttn           | Prc1          | Eif2ak2       | Inpp1         | Zfp59         |
| Ttll6           | lqca          | Efcab2        | Cenpv         | Kif2c   | Stard5   | Acvr1b        | Wdr35         | 2610015P09Rik | Adck3         | Mum1          |
| Spef2           | Myh10         | 1110008L16Rik | Cep55         | Kif6    | Stk32a   | Tppp3         | Ciapin1       | Rhbdd3        | Six4          | Nhsl1         |
| Stil            | Dtl           | Ckif          | Cep97         | Kntc1   | Syt17    | Tcea2         | Kif1a         | Dhx29         | Amacr         | Pygo2         |
| Usp2            | Ypel1         | Gm15800       | Ces1b         | Lace1   | Syt1l    | Cenpf         | Nprl3         | Lgals12       | Hectd3        | Cep63         |
| Efhdl           | Meig1         | Oxa1l         | Ces1c         | Lce1a1  | Tacc3    | Gpd1          | Man2c1        | Eefsec        | Ttc30b        | Emp3          |
| Ccna1           | Tal2          | Hspa4l        | Chga          | Lfng    | Tbc1d22b | Spq21         | Pdxk          | Pbx4          | Tagap         | Strbp         |
| Bcas1           | Tmem29        | Chrm1         | Lrrc17        | Jag1    | Tbcc     | Cars          | Cryaa         | Arid4a        | Nagp          | Pram1         |
| Lca5            | Wdr78         | Ccdc151       | Chst11        | Lrrc18  | Tcte3    | Hist1h2ae     | Ube2t         | Ccdc61        | Tagap1        | Tsga10        |
| Ropn1l          | Ccdc108       | Ift74         | Cmb1          | Lrrc43  | Tctn3    | Rars          | Eri1          | Rcbtb2        | Txndc12       | B9d2          |
| Fbp1            | Serac1        | Aldh3b1       | Cox10         | Lrrc56  | Tekt2    | Cox12         | Slc22a21      | Pxk           | Ift88         | Gm9833        |
| Qsox1           | Mast2         | Ccdc146       | Crispld2      | Lrrc6   | Tha1     | Foxo1         | Qser1         | Kif20a        | Hipk1         | Edar          |
| Armc4           | Gm7173        | Sord          | Csf3r         | Lrrc9   | Thrb     | Fbxl4         | Trp53         | Terf1         | Maged2        | Casp6         |
| Tbx1            | lqub          | Mycbp         | Cxcl12        | Ltbp2   | Tiam1    | Rrm1          | Zfp329        | Ruvbl2        | Haghl         | Mfap1b        |
| Egln3           | Nek4          | Bicd1         | D1Ert622e     | Mcm3    | Tmem102  | Rsp3a         | Atp6v1h       | Arhgap11a     | Zfp362        | Noc4l         |
| Gsta1           | Sass6         | Ets1          | D330045A20Rik | Mcp1    | Tmem104  | Fzr1l         | Spice1        | Gbf1          | Orc3          | Psmb8         |
| Zfp382          | Ccdc17        | Pex3          | Mdh1b         | Mcp1    | Tmem38a  | Pgag3         | Stx16         | Uap1          | Meaf6         | 1110032A03Rik |
| Spata17         | Tmem201       | Parn          | Dcdc2b        | Med12l  | Tmem52   | Spata2        | Rpgr          | Rasgrf1       | Aasdhpt       | D430042O09Rik |





## Supplemental Figure Legends

### Figure S1. Generation of the $p73^{\text{floxE7-9}}$ Mice, Related to Figure 1 (A)

Schematic representation of the targeting strategy used to conditionally delete exons 7, 8, and 9 of p73. Red triangles denote the introduced loxP sites. Black circles represent Frt sites utilized to remove the neomycin resistance cassette (NeoR) (orange box) by crossing with a FlpE deleter mouse (Rodriguez et al., 2000). The red rectangle marks the location of an exon 14 Southern probe for identification of recombinant clones in combination with Cla1 and HindIII restriction enzymes. A second probe located outside the long DNA homology arm that was used to screen the mESCs. Clone 2A7 (\*\*) had germline transmission leading to the mice utilized for this study. (B) Sanger sequencing of a PCR product from lung cDNA indicates in-frame splicing of exons 6 and 7 ( $p73^{+/+}$ ) and exons 6 and 10 ( $p73^{-/-}$ ). (C) qRT-PCR of lung cDNA was performed using primers within exon 5, across the exon 6/7 boundary, and within exon 10 of p73. Data are represented as normalized ratios of  $p73^{-/-}$  to  $p73^{+/+}$  mRNA expression. (D) Western analysis of protein harvested from lung tissue of the indicated genotyped animals shows absence of full-length p73 protein in the  $p73^{-/-}$  animals and a faster migrating immuno-reactive band in the  $p73^{+/-}$  and  $-/-$  samples, with a molecular weight consistent with expression of a p73 protein lacking exons 7-9 (\* = non-specific band). (E) Micrographs of MTECs isolated from tracheas of  $p73^{+/+}$  or  $p73^{-/-}$  animals, infected with non-silencing (NS) or two different p73 short hairpin RNA silencing constructs (shRNA 1 & 2), and grown in

differentiation media. Representative IF staining of p73 (red) and \* $\alpha$ -tubulin (green) is shown for each condition. Arrows indicate cilia and flagella within p73<sup>+/+</sup> animals.

**Figure S2. p73<sup>-/-</sup> Mice Show Evidence of Infection and Inflammation in the Lung, Sinus and Ears, Related to Figure 2** (A) Representative images of alcian blue (top panel) and H&E (bottom panel)-stained lungs from p73<sup>+/+</sup> and p73<sup>-/-</sup> mice. Mucin-producing cells and retained mucus are stained blue. (B) Representative H&E images of sinus and ears of p73<sup>+/+</sup> and p73<sup>-/-</sup> mice. The external ear canal (EC), middle ear (ME), tympanic membrane (TM) and malleus (M) are labeled. Arrows indicate areas of mucus and inflammation in the upper and lower panel, respectively.

**Figure S3. Representative Images from the Trachea and Bronchioles Used for the Quantification of Respiratory Epithelium Cell Types Shown in Figure 3, Related to Figure 3 as well as Table S1** IF detection of the indicated proteins in murine tracheal and bronchiolar tissue from mice of the indicated genotype. Foxj1 (green) was used as a marker of the ciliated cells. Scgb1a1 (red) was used as a marker of club cells. Alcian blue staining was used to detect mucin-producing goblet cells. Pgp9.5 (yellow) was used as a marker of neuroendocrine cells. p63 (red) was used as a marker of the basal cells within the murine trachea (scale bars = 25  $\mu$ m).

**Figure S4. p73 is Expressed in Ciliated and Basal Cells Within the Human Airway, Related to Figure 4** Representative IF micrographs for the indicated proteins on sections of lung tissue from ten individual human patients . (A) \* $\alpha$ -tubulin (green) and p73 (red) staining is consistent with a much higher percentage of MCC in human bronchiolar epithelium as compared to murine. (B) Foxj1 (green) and p73 (red) staining showing basal cells with single p73 positivity as well as luminal MCCs with co-expression of p73 and Foxj1. (C) p63 (green) and p73 (red) IF shows basal localization of p63 while p73 protein expression patterns are similar to that observed in the murine tracheal epithelium - both basal and ciliated (scale bar= 50  $\mu$ m).

**Figure S5. Analysis of DNA-Binding Profiles after *in situ* Protein-DNA Crosslinking and ChIP-seq (p73, p63 and Pol II) of Murine Tracheal Cells Related to Figure 5 and Table S2** (A) Heatmap of hierarchically clustered Pearson correlations between ChIP-seq samples. (B) Analysis of the genomic features of the p73, p63 and Pol II binding sites. The first column under each protein section indicates the number of peaks observed within each respective genomic feature. The second column indicates the log ratio of binding enrichment for the peaks identified over the expected overlap based on the size of the given genomic feature. The final column lists the p-values for the observed enrichment of each feature type. (C) Summary of the number of binding sites and median



distance to transcriptional start sites (TSS) for the Pol II, p73, and p63 ChIP-seq datasets. (D) CDF plot comparing the RNA expression levels of genes bound by p73 within 25,000 kb of their TSS versus genes not bound. Significance testing was performed using the Kolmogorov-Smirnov test. (E) Binding motifs identified in p73 and p63 ChIP-seq peaks. (F) Table of binding profiles of known target genes Mdm2 and Cdkn1a, including the q-value significance of the binding sites observed at each of the genes, and the bp distance from the middle of each binding site to the TSS, along with notation for whether a corresponding p63 binding site was found at the same location. Below the table are Integrative Genomics Viewer screenshots of Mdm2 and Cdkn1a in which the four tracks show ChIP-seq data normalized to 1x depth of coverage and presented with identical scales. The bottom three tracks represent DNA reads that were obtained following ChIP with the antibodies listed to the left, and the top track is the input sample for comparison. At the bottom of each panel is an annotated exon/intron gene structure displayed on the same scale as the ChIP-seq tracks with a gray arrow at the bottom annotating the gene orientation.

**Figure S6. Additional p73 Binding to Novel Target Genes in Cilia-Associated Gene Set, Related to Figure 5, Table S2, Table S3, Table S4 and Table S5** At top, a Venn diagram illustrates the overlap of genes featuring a p73 binding site within 25 kb of their transcriptional start site (930 total) with the cilia-associated gene set (1398 total) (Treutlein et al., 2014). The 105 overlapping

genes are detailed at bottom. For each gene, the q-value significance and distance to the respective TSS for the associated binding sites are indicated along with notation for whether a corresponding p63 binding site was found at the same location. Genes are ranked by decreasing q-value and are highlighted in gray if they were significantly differentially expressed after exogenous overexpression of p73 in either p73+/+ or p73-/- MTEC cultures, as described in Figure 5.

**Table S1. Quantification of Epithelial Cells within Pulmonary Epithelium, Related to Figure 3.** Table of 24 fields of view analyzed to determine percentage of positive cells as presented in Figure 3, with representative images present in Figure 3S. The data are represented as number of positive cells over the total number of nuclei present within 0.02 mm<sup>2</sup> for IF micrographs (neuroendocrine, basal, club, and MCC) and 0.15 μm<sup>2</sup> for micrographs of alcian blue staining (mucin). Data are represented for each genotype and grouped for each of the cell types that make up the tracheal and bronchiole epithelium. Also included are the “average percent positive” cells with standard deviation for an indicated epithelial cell type of a given genotype relative to all epithelial cells within the area for 24 fields counted.

**Table S2. Complete List of Genomic Binding Sites Identified Through ChIP-seq for p73, p63 and Pol II, Related to Figures 5, S5 and S6.** Coordinates of

MACS2-identified genomic binding sites and Homer peak annotations for p73, p63, and Pol II are listed on individual sheets. For each CHIP-seq sample, peaks were annotated with the nearest GENCODE M7 TSS and protein coding TSS.

**Table S3. RNA-seq Expression Profile of Murine Tracheal Epithelium, Related to Figures 5 and S5.** TPM gene expression estimates are listed for all GENCODE M7 genes in the duplicate scraped tracheal epithelial RNA samples from p73<sup>+/+</sup> animals.

**Table S4. Cilia-Associated Gene Set, Related to Figures 5 and S6.** Genes that have been published as MCC cell type marker genes and were used in our analysis (Treutlein et al.,2014). Genes unique to MCCs and only those genes matching to Gencode M7 protein coding genes and standard chromosome locations are listed for reference.

**Table S5. RNA-seq Expression Profile of p73<sup>+/+</sup> and p73<sup>-/-</sup> MTECs After Ectopic p73 Expression, Related to Figures 5, S5 and S6.** The raw read count table used as input for differential gene expression analysis. Expression was conducted in duplicate for each condition as indicated. TPM gene expression estimates are included as a separate sheet for reference.

## **Extended Experimental Procedures:**

### **Protein harvest and immunoblotting**

Whole mouse lungs were homogenized and lysed in RIPA buffer and immunoblot analysis was conducted as previously described (Westfall et al., 2003) for p73 (EP436Y; Abcam) using 50ug of tissue lysate.

### **Histology and immunofluorescence**

Mouse tissues were fixed in 10% neutral buffered formalin and paraffin embedded for sectioning. Alcian blue (pH 2.5) staining for mucin cells was performed as previously described (Hayat, 1993). Immunofluorescence was conducted using antibodies against Foxj1 (2A5; eBioscience), p63 (H129; Santa Cruz), p73 (EP436Y; Abcam), Pgp9.5 (ab8189; Abcam), Scgb1a1 (ab40873; Abcam),  $\alpha$ -tubulin (611B-1; Sigma),  $\gamma$ -tubulin (T5326; Sigma), Krt5 (20R-CP003; Fitzgerald), and Krt14 (20R-CP002; Fitzgerald). Amplification by TSA Plus Fluorescein System or TSA Plus Cyanine 3 System (Perkin Elmer) was used for detection of Foxj1, p63, p73, Pgp9.5, Scgb1a1, and  $\gamma$ -tubulin.  $\alpha$ -tubulin, Krt5, and Krt14 were detected using Alexa Fluor (Life Technologies) secondary antibodies. SlowFade Gold Antifade Mountant with DAPI (S36939; Invitrogen) was used as a nuclear marker. Immunohistochemistry was conducted using pan-cytokeratin (bs-1712R; Bioss) and anti-alpha smooth muscle actin (ab32575; Abcam) antibodies.

### **shRNA-mediated gene knockdown**



shRNAs directed to the 3' untranslated region (shRNA 1-GAACTGCCCTTAGCTACATAT) and exon 6 (shRNA 2-AGTGTGGTTGTGCCGTATG) of p73 were purchased from Sigma Aldrich. MISSION TRC2 Non-Mammalian shRNA (Sigma Aldrich) was used as a negative control. Viral production and transduction was performed as previously described (Rubinson et al., 2003).

### **Scraped murine tracheal RNA harvest, qRT-PCR, and Sanger sequencing**

RNA was harvested from tissue by scraping the epithelium of the trachea in Trizol and purified using the Aurum Total RNA Mini kit (Bio-Rad). qRT-PCR experiments were conducted using oligo(dT)-mediated first-strand synthesis and SYBR Green quantification. mRNA levels were quantified using primers targeting exon 5 (GACATGCCCCATCCAGATCA /AGCTCGTGGTTGGGGCAGCG), the exon 6/7 Junction (GTGGATGACCCTGTCACCGG/GAAGTTGTACAGGATGGTGG) and exon 10 (GGTGA CTGGCCTCTGTAGG/CTGGTCCTTCGAAATGACTAC) of p73. Sanger sequencing was conducted using identical primers.

### **Murine tracheal epithelial cell (MTEC) culture, exogenous expression, and RNA harvest**

MTECs were isolated, cultured, and differentiated as previously described (Lam et al., 2011; Vladar and Brody, 2013). MTECs harvested from p73<sup>+/+</sup> and p73<sup>-/-</sup> mice were infected twice (at time of plating and 12 h later) with TAp73 $\beta$  and Fg12-CMV control expression vectors as described previously (Rosenbluth

et al., 2011; Rosenbluth et al., 2008). For Fig. 6B, MTECs were grown as submerged cultures on collagen-coated plates for 3 d in MTEC growth media (DMEM/F12 supplemented with HEPES, L-glutamine, NaHCO<sub>3</sub>, penicillin-streptomycin, fungizone, insulin, transferrin, cholera toxin, EGF, bovine pituitary extract and FBS). For Fig. S1E and Fig. 6B, MTECs were grown as submerged cultures on collagen-coated plates for 3 d in DMEM and then switched to differentiation media containing 2% NuSerum for 3 d (Lam et al., 2011; Vldar and Brody, 2013). For Fig. 5 and Fig. S6, MTECs were grown in transwells containing MTEC growth media for 5 days and then lifted to air-liquid interface for 24 h in differentiation media (, followed by RNA harvest using the Aurum Total RNA Mini kit (Bio-Rad).

### **RNA-seq and analysis**

For Figure S5, RNA from five scraped tracheas was pooled in duplicate experiments and submitted to the Vanderbilt Technologies for Advanced Genomics core for library preparation and RNA-seq. For Fig. 5 and Fig. S6, duplicate samples for each of the four genotype/expression conditions (n=8 total) were submitted to the HudsonAlpha Genomic Services Lab for library preparation and RNA-seq. For both experiments, reads were trimmed to remove adapter sequences with Flexbar v2.4 (Dodt et al., 2012) and aligned to mm10 using STAR (Dobin et al., 2013) v2.4.2a with GENCODE (Harrow et al., 2012) M7 comprehensive gene annotations. Cufflinks v2.1.1 (Roberts et al., 2011) was used to assemble transcripts and quantify their abundance. Cufflinks FPKM

estimates were converted to TPM estimates (Li et al., 2010) and are included in Supplementary Tables S2 and S4. For differential gene expression analysis, reads were assigned to GENCODE M7 comprehensive genes using featureCounts (Liao et al., 2014) (v1.4.6-p5) and tested for differential expression using DESeq2 (Love et al., 2014) v1.8.1 with default parameters. Genes with an adjusted p-value <0.1 in the DESeq2 output were considered significantly differentially expressed. Raw sequencing data have been deposited at the NCBI Sequence Read Archive under accession numbers SRA#X and SRA#X (will be given prior to publication).

### **ChIP-seq Data Analysis**

Twenty to fifty million single-end 50 bp reads were generated for each ChIP-seq library using the Illumina HiSeq platform. Reads were trimmed to remove adapters sequences with Flexbar v2.4 (Dodt et al., 2012), aligned to GRCm38 using BWA-backtrack v0.6.1 (Li and Durbin, 2009) with default parameters, and filtered to remove reads with mapping qualities less than 30. MACS2 v2.0.10.20131216 (Zhang et al., 2008) was used to identify sites of genomic binding with default parameters and a q-value threshold of 0.05 using an input control. MACS2 binding sites were filtered to remove mouse ENCODE blacklisted regions (Consortium, 2012) and mitochondrial DNA sites. Annotation of binding sites with the nearest GENCODE M7 comprehensive TSS and overlap with genomic features was performed using Homer (Heinz et al., 2010) v4.7. Motif analysis was conducted using the GLAM2 (Frith et al., 2008) command line

tool. Correlation of read counts between ChIP-seq samples at sites of p63, p73, or Pol II genomic binding was performed with the deepTools bamCorrelate command line tool (Ramirez et al., 2014). The read alignments of ChIP-seq samples were 1X depth of coverage normalized for display in IGV using deepTools (Ramirez et al., 2014) bamCoverage command line tool. To analyze the overlap between our p73 ChIP-seq and the cilia-associated gene list, (Treutlein et al., 2014) we restricted our analysis to those genes shared between the different annotation methods used between the two studies.

## References

- Consortium, E.P. (2012). An integrated encyclopedia of DNA elements in the human genome. *Nature* *489*, 57-74.
- Dobin, A., Davis, C.A., Schlesinger, F., Drenkow, J., Zaleski, C., Jha, S., Batut, P., Chaisson, M., and Gingeras, T.R. (2013). STAR: ultrafast universal RNA-seq aligner. *Bioinformatics* *29*, 15-21.
- Dotz, M., Roehr, J.T., Ahmed, R., and Dieterich, C. (2012). FLEXBAR-Flexible Barcode and Adapter Processing for Next-Generation Sequencing Platforms. *Biology* *1*, 895-905.
- Frith, M.C., Saunders, N.F., Kobe, B., and Bailey, T.L. (2008). Discovering sequence motifs with arbitrary insertions and deletions. *PLoS computational biology* *4*, e1000071.



Harrow, J., Frankish, A., Gonzalez, J.M., Tapanari, E., Diekhans, M., Kokocinski, F., Aken, B.L., Barrell, D., Zadissa, A., Searle, S., *et al.* (2012). GENCODE: the reference human genome annotation for The ENCODE Project. *Genome research* 22, 1760-1774.

Hayat, M.A. (1993). *Stains and cytochemical methods* (New York: Plenum Press).

Heinz, S., Benner, C., Spann, N., Bertolino, E., Lin, Y.C., Laslo, P., Cheng, J.X., Murre, C., Singh, H., and Glass, C.K. (2010). Simple combinations of lineage-determining transcription factors prime cis-regulatory elements required for macrophage and B cell identities. *Molecular cell* 38, 576-589.

Lam, H.C., Choi, A.M., and Ryter, S.W. (2011). Isolation of mouse respiratory epithelial cells and exposure to experimental cigarette smoke at air liquid interface. *Journal of visualized experiments : JoVE*.

Li, B., Ruotti, V., Stewart, R.M., Thomson, J.A., and Dewey, C.N. (2010). RNA-Seq gene expression estimation with read mapping uncertainty. *Bioinformatics* 26, 493-500.

Li, H., and Durbin, R. (2009). Fast and accurate short read alignment with Burrows-Wheeler transform. *Bioinformatics* 25, 1754-1760.

Liao, Y., Smyth, G.K., and Shi, W. (2014). featureCounts: an efficient general purpose program for assigning sequence reads to genomic features. *Bioinformatics* 30, 923-930.

Love, M.I., Huber, W., and Anders, S. (2014). Moderated estimation of fold change and dispersion for RNA-seq data with DESeq2. *Genome biology* 15, 550.

Ramirez, F., Dundar, F., Diehl, S., Gruning, B.A., and Manke, T. (2014). deepTools: a flexible platform for exploring deep-sequencing data. *Nucleic acids research* *42*, W187-191.

Roberts, A., Pimentel, H., Trapnell, C., and Pachter, L. (2011). Identification of novel transcripts in annotated genomes using RNA-Seq. *Bioinformatics* *27*, 2325-2329.

Rosenbluth, J.M., Mays, D.J., Jiang, A., Shyr, Y., and Pietenpol, J.A. (2011). Differential regulation of the p73 cistrome by mammalian target of rapamycin reveals transcriptional programs of mesenchymal differentiation and tumorigenesis. *Proceedings of the National Academy of Sciences of the United States of America* *108*, 2076-2081.

Rosenbluth, J.M., Mays, D.J., Pino, M.F., Tang, L.J., and Pietenpol, J.A. (2008). A gene signature-based approach identifies mTOR as a regulator of p73. *Molecular and cellular biology* *28*, 5951-5964.

Rubinson, D.A., Dillon, C.P., Kwiatkowski, A.V., Sievers, C., Yang, L., Kopinja, J., Rooney, D.L., Zhang, M., Ihrig, M.M., McManus, M.T., *et al.* (2003). A lentivirus-based system to functionally silence genes in primary mammalian cells, stem cells and transgenic mice by RNA interference. *Nature genetics* *33*, 401-406.

Treutlein, B., Brownfield, D.G., Wu, A.R., Neff, N.F., Mantalas, G.L., Espinoza, F.H., Desai, T.J., Krasnow, M.A., and Quake, S.R. (2014). Reconstructing lineage hierarchies of the distal lung epithelium using single-cell RNA-seq. *Nature* *509*, 371-375.

Vladar, E.K., and Brody, S.L. (2013). Analysis of ciliogenesis in primary culture mouse tracheal epithelial cells. *Methods in enzymology* 525, 285-309.

Westfall, M.D., Mays, D.J., Sniezek, J.C., and Pietsenpol, J.A. (2003). The Delta Np63 alpha phosphoprotein binds the p21 and 14-3-3 sigma promoters in vivo and has transcriptional repressor activity that is reduced by Hay-Wells syndrome-derived mutations. *Molecular and cellular biology* 23, 2264-2276.

Zhang, Y., Liu, T., Meyer, C.A., Eeckhoute, J., Johnson, D.S., Bernstein, B.E., Nusbaum, C., Myers, R.M., Brown, M., Li, W., *et al.* (2008). Model-based analysis of ChIP-Seq (MACS). *Genome biology* 9, R137.
